# Supplementary material for: Proton location in acid⋯pyridine hydrogen bonds of multi-component crystals
Source: Royal Society of Chemistry journal article supplement (doi:10.1039/c4ce00043a), 2014-01-01
Supplement: c4ce00043a1.pdf [file c4ce00043a1.pdf]

## Electronic Supporting Information for Proton Location in Acid...Pyridine Hydrogen Bonds of Multi-Component Crystals.

Colin C. Seaton

*Division of Chemistry and Forensic Sciences, School of Life Sciences, University of Bradford,  
Richmond Road, Bradford, UK, BD7 1DP.*

*Synthesis and Solid State Pharmaceutical Centre, Materials and Surface Science Institute, University  
of Limerick, Ireland.*

### Crystal Structures

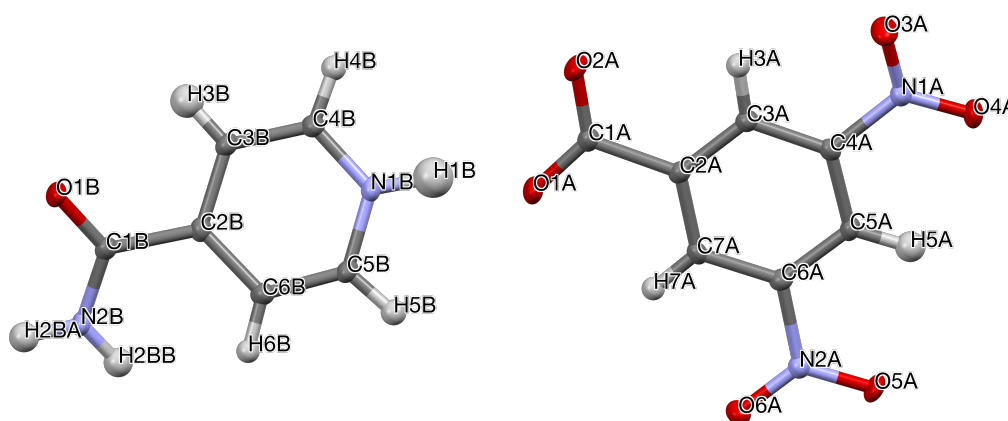

Figure S1. Asymmetric Cell of **1.a** as an ORTEP-style image (atom labels show for each molecule).

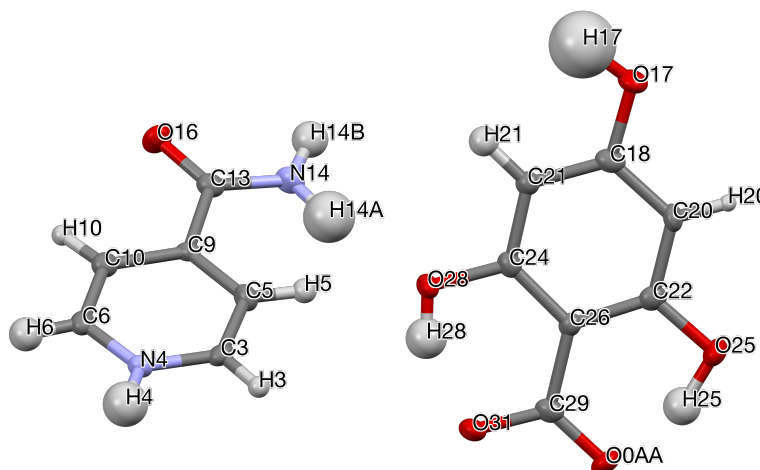

Figure S2. Asymmetric Cell of **3.a** as an ORTEP-style image (atom labels show for each molecule).

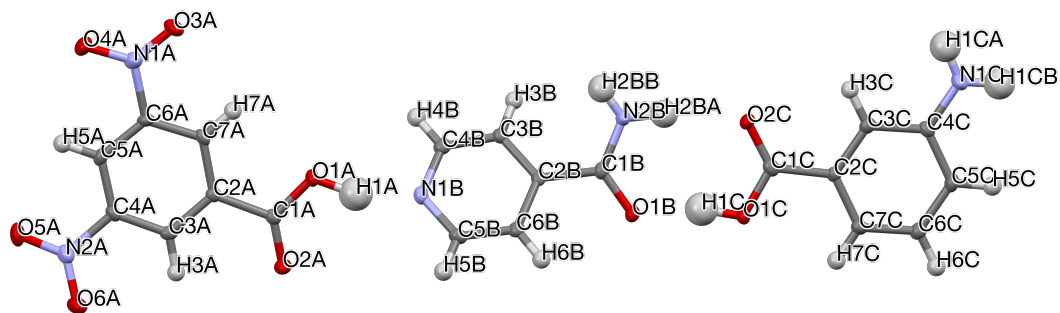

Figure S3. Asymmetric Cell of **1.a.2** as an ORTEP-style image (atom labels show for each molecule).

## Correlation Plots

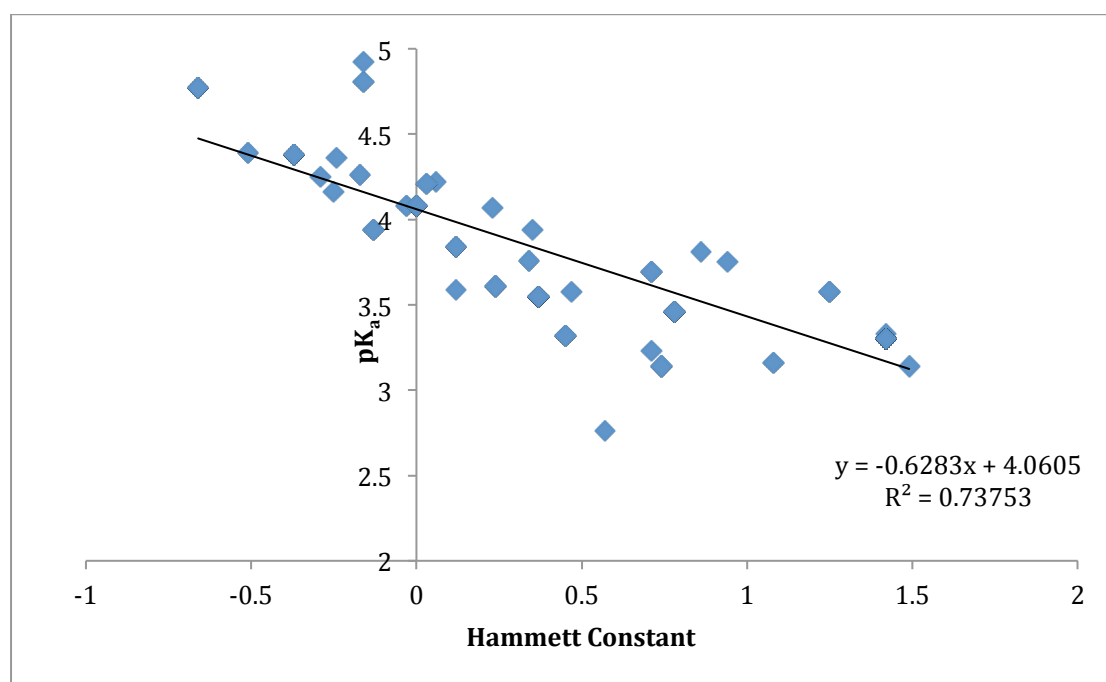

Figure S4. Plot of  $pK_a$  values of the analysed benzoic acids against their Hammett Constants. Least squares fitted linear correlation is plotted as a solid line.

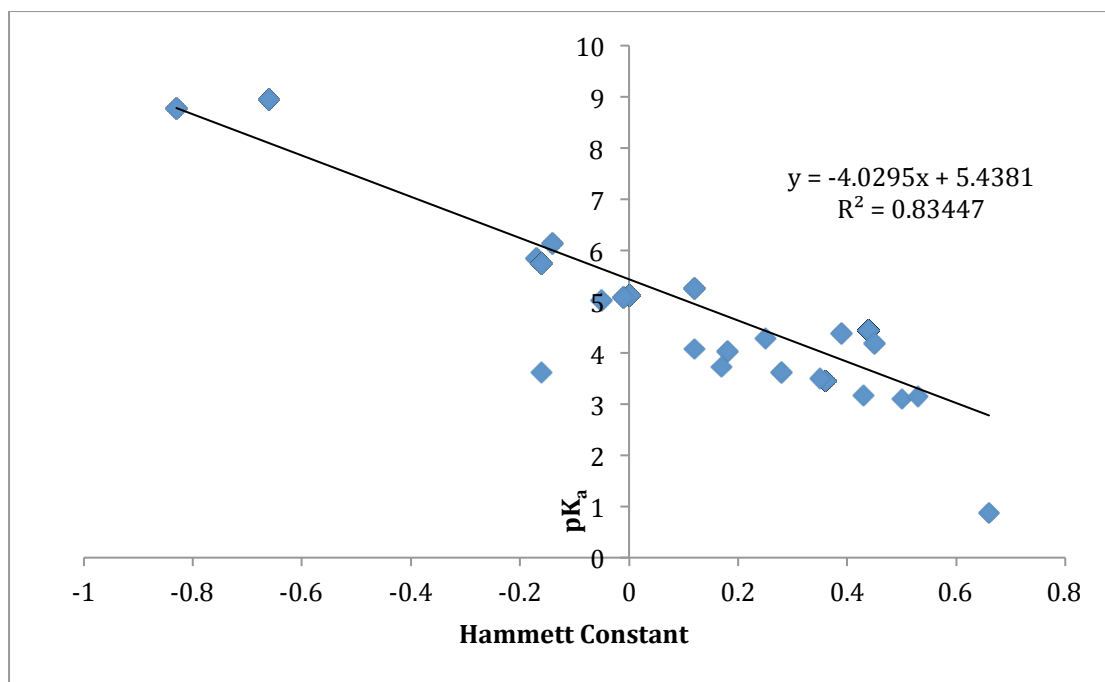

*Figure S5. Plot of pK<sub>a</sub> values of the analysed pyridines against their Hammett Constants. Least squares fitted linear correlation is plotted as a solid line.*
